# Supplementary material
Source: PubMed Central journal article supplement (PMC5591751)
Supplement: NIHMS859664-supplement-efigure_OS.pdf [file NIHMS859664-supplement-efigure_OS.pdf]

### OS by Quartile of Average Dose per 6-Week Cycle of Sunitinib

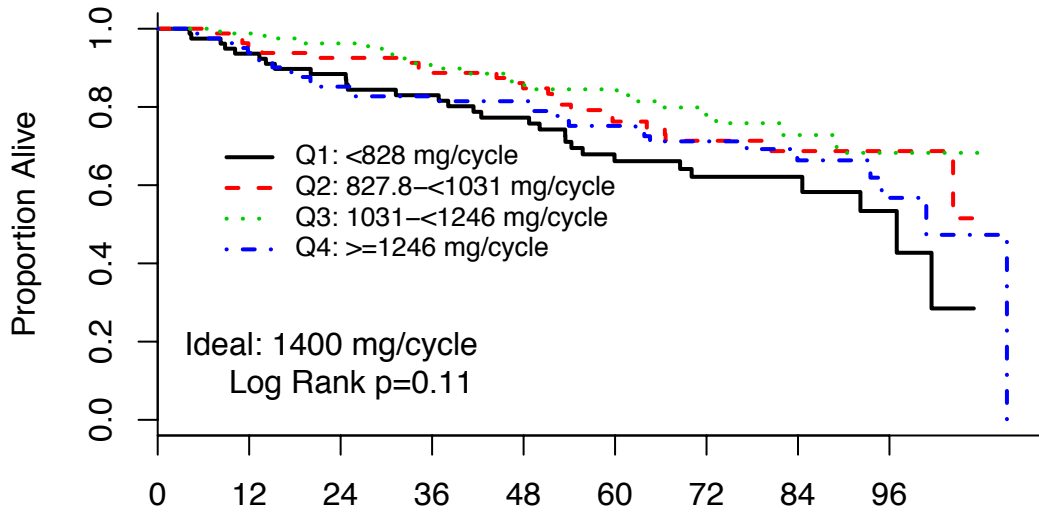

| No. at Risk |    | Months |    |    |    |    |    |    |    |    |  |
|-------------|----|--------|----|----|----|----|----|----|----|----|--|
|             |    | 0      | 12 | 24 | 36 | 48 | 60 | 72 | 84 | 96 |  |
| Q1          | 83 | 73     | 66 | 59 | 51 | 38 | 26 | 16 | 8  |    |  |
| Q2          | 83 | 76     | 73 | 68 | 62 | 52 | 34 | 22 | 6  |    |  |
| Q3          | 84 | 79     | 75 | 69 | 64 | 57 | 36 | 18 | 10 |    |  |
| Q4          | 84 | 76     | 69 | 66 | 65 | 58 | 43 | 23 | 9  |    |  |

### OS by Quartile of Average Dose per 6-Week Cycle of Sorafenib

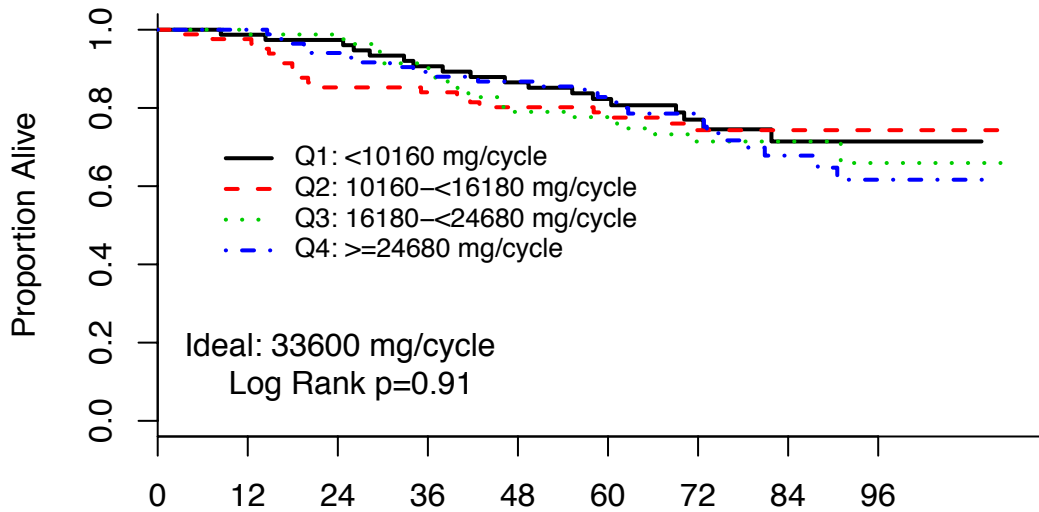

| No. at Risk |    | Months |    |    |    |    |    |    |    |    |  |
|-------------|----|--------|----|----|----|----|----|----|----|----|--|
|             |    | 0      | 12 | 24 | 36 | 48 | 60 | 72 | 84 | 96 |  |
| Q1          | 83 | 75     | 73 | 66 | 63 | 51 | 32 | 18 | 6  |    |  |
| Q2          | 84 | 79     | 69 | 67 | 62 | 57 | 36 | 23 | 12 |    |  |
| Q3          | 83 | 81     | 80 | 73 | 63 | 54 | 35 | 16 | 6  |    |  |
| Q4          | 84 | 84     | 79 | 72 | 69 | 60 | 47 | 24 | 11 |    |  |
